# Supplementary material for: Deletion of afpab1 Causes Increased Sensitivity to Oxidative Stress and Hypovirulence in Aspergillus fumigatus
Source: PubMed Central journal article supplement (PMC5133812; doi:10.3390/ijms17111811), 2016-10-29
Supplement: ijms-17-01811-s001.pdf [file ijms-17-01811-s001.pdf]

## Supplementary Materials: Deletion of *afpab1* Causes Increased Sensitivity to Oxidative Stress and Hypovirulence in *Aspergillus fumigatus*

Dongyang Wang, Shunan Wang, Dan He, Song Gao, Baiji Xue and Li Wang

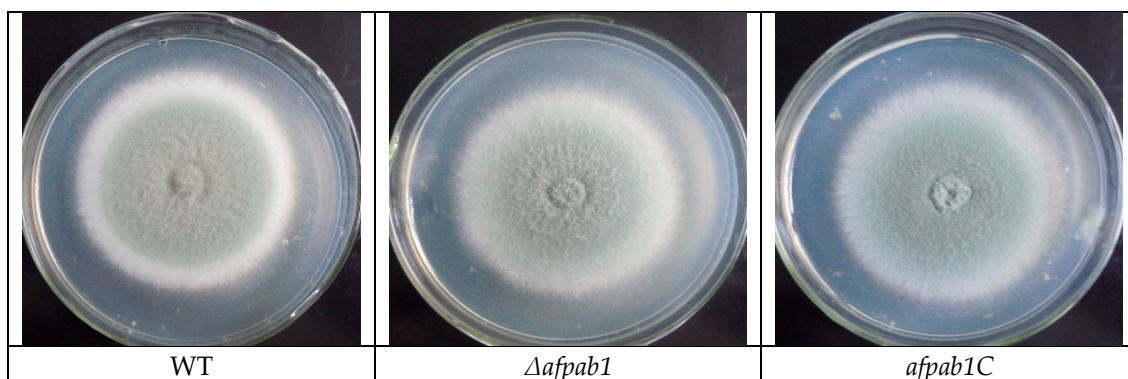

**Figure S1.** The morphology of colony from WT,  $\Delta afpab1$  and *afpab1C* strains on PDA medium at 4 days.

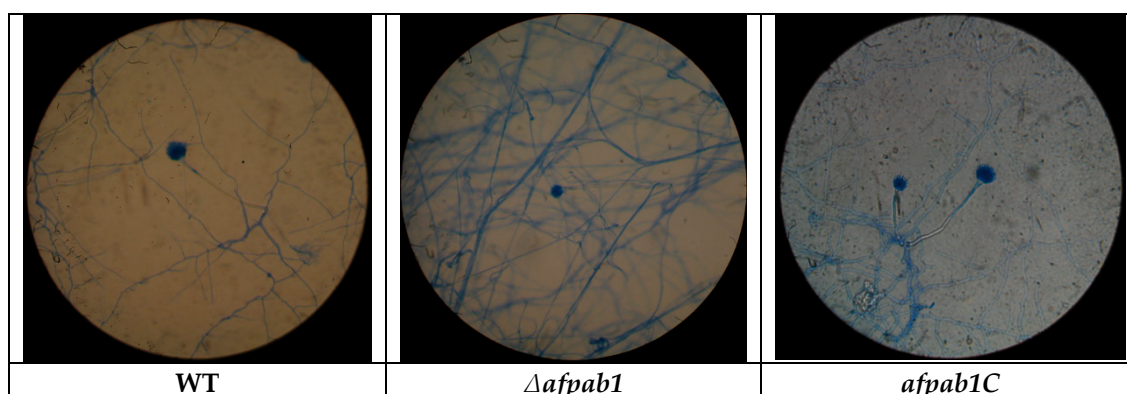

**Figure S2.** The microscopic morphology from WT,  $\Delta afpab1$  and *afpab1C* strains on PDA medium at 4 days (200 $\times$ ).

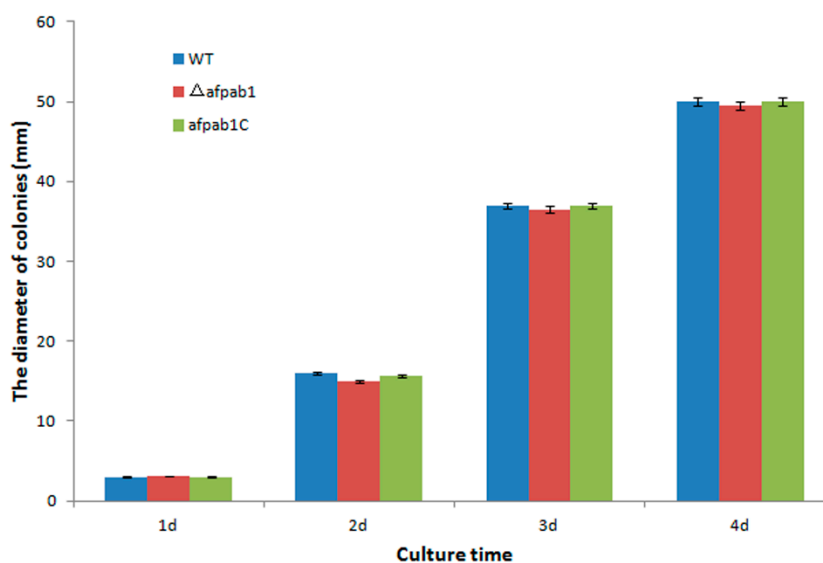

**Figure S3.** The diameters of colonies from WT,  $\Delta afpab1$  and *afpab1C* strains on PDA culture at 28 °C.

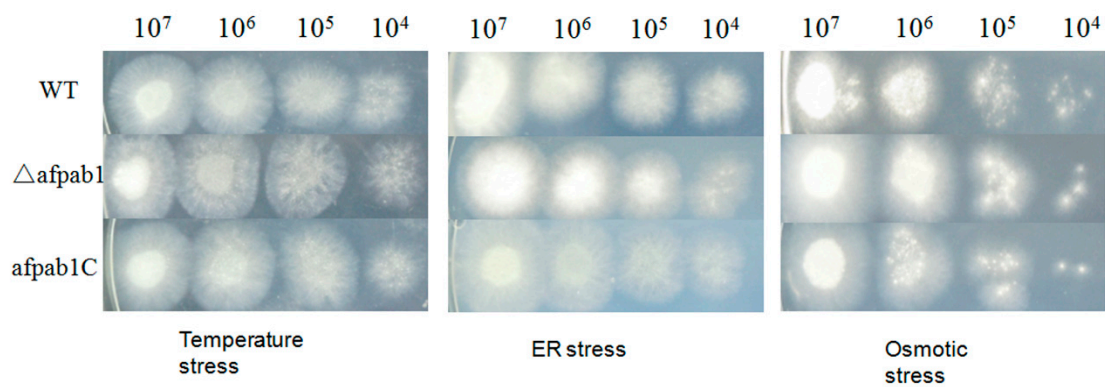

**Figure 4.** The plate assays from WT,  $\Delta afpab1$  and *afpab1C* strains under different stress condition (temperature stress, ER stress, Osmotic stress). In general, there is no clear difference under this stress condition between strains.
